# Supplementary material for: Secondary Metabolites Profiled in Cannabis Inflorescences, Leaves, Stem Barks, and Roots for Medicinal Purposes
Source: Springer Nature journal article supplement (doi:10.1038/s41598-020-60172-6), 2020-02-24
Supplement: MOESM1 [file 41598_2020_60172_MOESM1_ESM.pdf]

## Supplementary information of

### Secondary Metabolites Profiled in Cannabis Inflorescences, Leaves, Stem Barks, and Roots for Medicinal Purposes

Dan Jin<sup>1,2</sup>, Kaiping Dai<sup>2</sup>, Zhen Xie<sup>2</sup>, and Jie Chen<sup>\*,1,3</sup>

<sup>1</sup>Biomedical Engineering Department, University of Alberta, Edmonton, Alberta, Canada

<sup>2</sup>Labs-Mart Inc., Edmonton, Alberta, Canada

<sup>3</sup>Electrical and Computer Engineering Department, University of Alberta, Edmonton, Alberta, Canada

\*Corresponding author email [jc65@ualberta.ca](mailto:jc65@ualberta.ca)

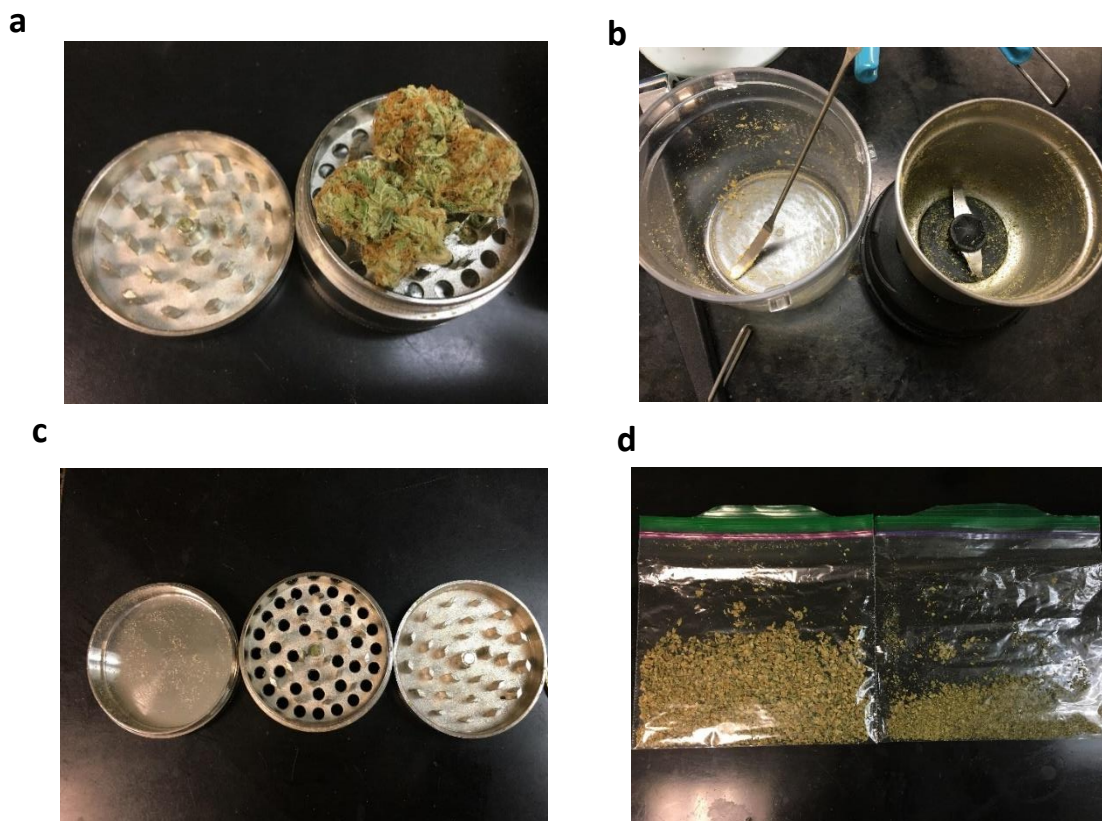

**Supplementary Figure 1.** Pulverization of cannabis raw samples using **a.** manual grinder and **b.** electric blender. **c.** The inside of manual grinder is relatively clean without much resin left behind whereas there is a layer of resin stuck to the inside of the cup of the electric blender. **d.** The resultant particle size is larger using the manual grinder (left) than the electric blender (right).

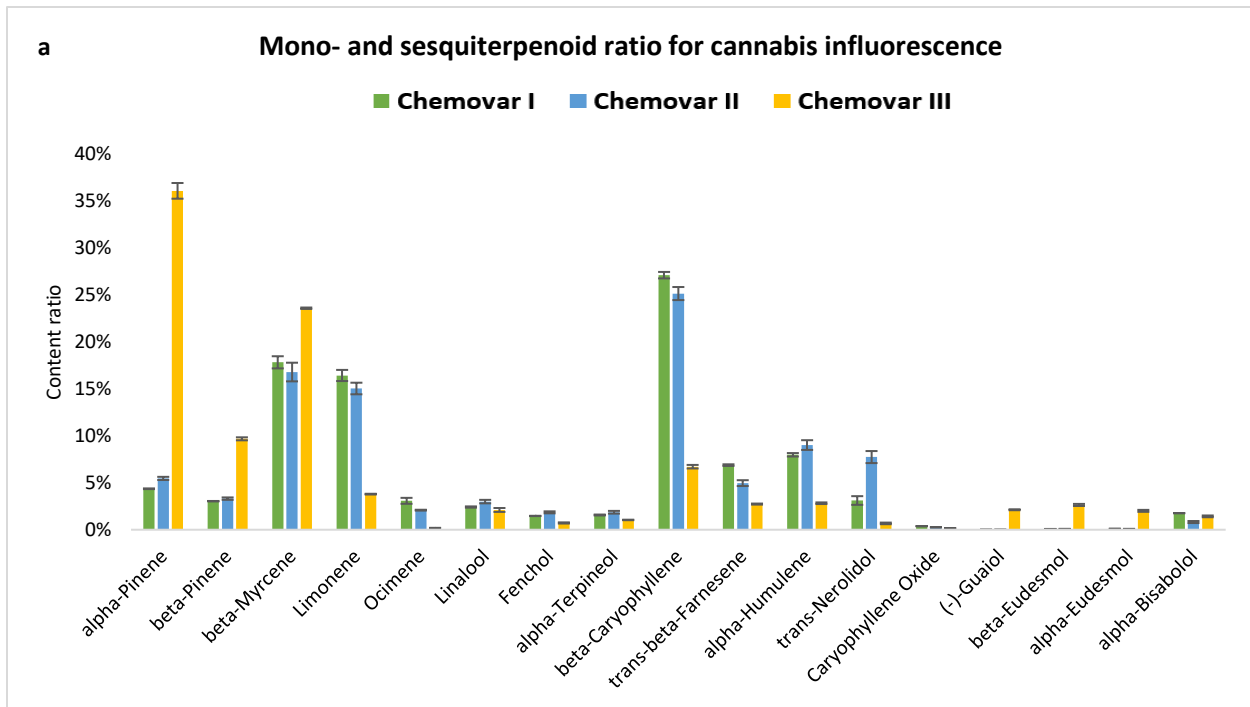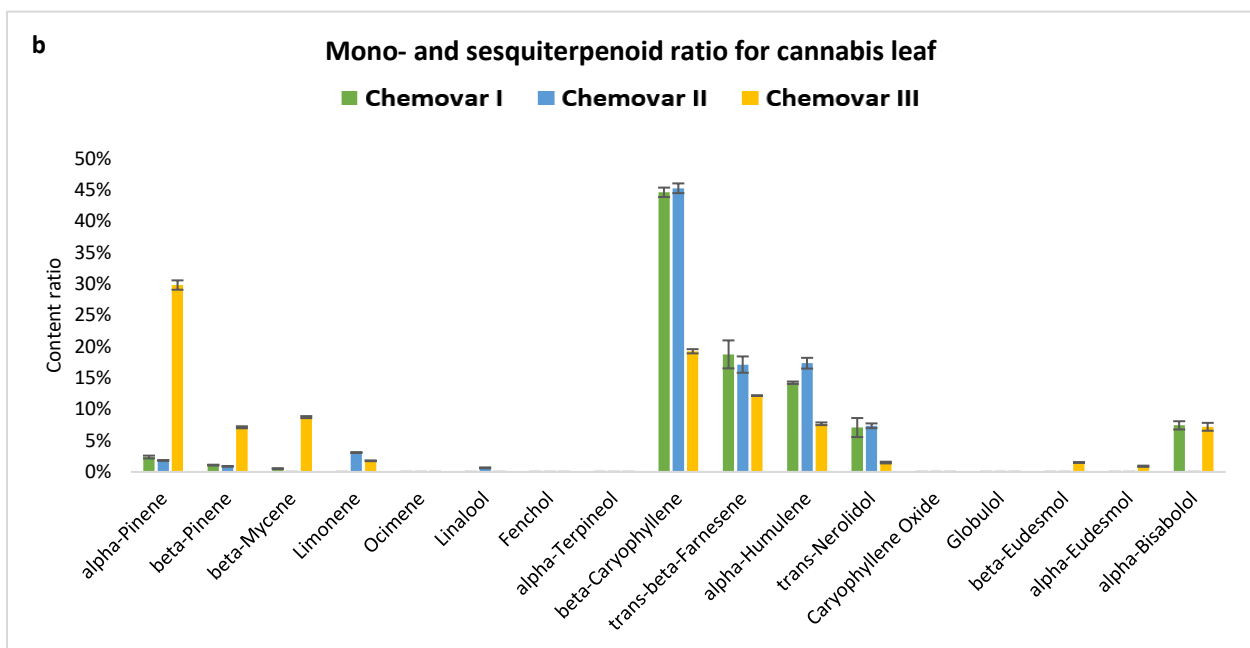

**Supplementary Figure 2. Mono- and sesquiterpenoid ratios in inflorescences and leaves in three strains. a.** Mono- and sesquiterpenoid ratios in inflorescence. **b.** Mono- and sesquiterpenoid ratios in leaves. The absolute values and ratios of individual terpenoids were consistent when compared among three strains, although total terpenoid content was significantly different.

**Supplementary Table 1. ANOVA regression statistics for cannabinoids.**

|                     | Quantification<br>Range ( $\mu\text{g/mL}$ ) | Correlation<br>Coefficient $R^2$ | Slope $\pm$ SD      | LOD<br>( $\mu\text{g/mL}$ ) | LOQ<br>( $\mu\text{g/mL}$ ) |
|---------------------|----------------------------------------------|----------------------------------|---------------------|-----------------------------|-----------------------------|
| 1. CBDV             | 0.01-1.00                                    | 1.0000                           | 1.3246 $\pm$ 0.0031 | 0.001                       | 0.003                       |
| 2. CBDVA            | 0.01-1.00                                    | 1.0000                           | 0.7432 $\pm$ 0.0008 | 0.002                       | 0.005                       |
| 3. CBG              | 0.01-1.00                                    | 0.9998                           | 0.8367 $\pm$ 0.0053 | 0.002                       | 0.005                       |
| 4. CBD              | 0.01-1.00                                    | 1.0000                           | 1.3841 $\pm$ 0.0040 | 0.0005                      | 0.001                       |
| 5. CBDA             | 0.01-1.00                                    | 1.0000                           | 0.7174 $\pm$ 0.0004 | 0.001                       | 0.003                       |
| 6. THCV             | 0.01-1.00                                    | 1.0000                           | 1.8763 $\pm$ 0.0022 | 0.0004                      | 0.001                       |
| 7. CBGA             | 0.01-1.00                                    | 1.0000                           | 0.6690 $\pm$ 0.0015 | 0.003                       | 0.008                       |
| 8. CBN              | 0.01-1.00                                    | 0.9999                           | 2.9331 $\pm$ 0.0127 | 0.001                       | 0.002                       |
| 9. $\Delta^9$ -THC  | 0.01-1.00                                    | 1.0000                           | 1.8042 $\pm$ 0.0024 | 0.001                       | 0.003                       |
| 10. $\Delta^8$ -THC | 0.01-1.00                                    | 1.0000                           | 0.9145 $\pm$ 0.0009 | 0.002                       | 0.005                       |
| 11. THCVA           | 0.01-1.00                                    | 0.9999                           | 0.5474 $\pm$ 0.0028 | 0.003                       | 0.010                       |
| 12. CBC             | 0.01-1.00                                    | 1.0000                           | 0.6329 $\pm$ 0.0018 | 0.002                       | 0.007                       |
| 13. THCA            | 0.01-1.00                                    | 1.0000                           | 0.5700 $\pm$ 0.0012 | 0.003                       | 0.009                       |
| 14. CBCA            | 0.01-1.00                                    | 0.9998                           | 0.2333 $\pm$ 0.0017 | 0.004                       | 0.012                       |

**Supplementary Table 2.** Trueness, precision, and accuracy for cannabinoids

| Analyte                 | Spike 0.1 µg/mL |                        |                |                             | Spike 0.5 µg/mL |                        |                |                             | Spike 1.0 µg/mL |                        |                |                             |
|-------------------------|-----------------|------------------------|----------------|-----------------------------|-----------------|------------------------|----------------|-----------------------------|-----------------|------------------------|----------------|-----------------------------|
|                         | Repeatability   | Intermediate precision | Trueness       | Accuracy                    | Repeatability   | Intermediate precision | Trueness       | Accuracy                    | Repeatability   | Intermediate precision | Trueness       | Accuracy                    |
|                         | -               | -                      | -              | -                           | -               | -                      | -              | -                           | -               | -                      | -              | -                           |
|                         | Pooled RSD%     | RSD%                   | Relative bias% | Uncertainty of measurement% | Pooled RSD%     | RSD%                   | Relative bias% | Uncertainty of measurement% | Pooled RSD%     | RSD%                   | Relative bias% | Uncertainty of measurement% |
| (n=3)                   | (n=9)           | (n=9)                  | (n=9)          | (n=3)                       | (n=9)           | (n=9)                  | (n=9)          | (n=3)                       | (n=9)           | (n=9)                  | (n=9)          |                             |
| 1. CBDV                 | 1.0             | 1.7                    | -4.0           | 4.3                         | 1.0             | 4.8                    | -0.1           | 4.8                         | 0.9             | 3.6                    | -2.6           | 4.4                         |
| 2. CBDVA                | 1.7             | 1.5                    | 0.2            | 1.5                         | 0.8             | 4.6                    | -0.3           | 4.6                         | 1.2             | 3.8                    | -2.7           | 4.7                         |
| 3. CBG                  | 3.0             | 12.3                   | 0.9            | 12.3                        | 6.5             | 6.1                    | 2.1            | 6.4                         | 4.0             | 7.7                    | -5.2           | 9.3                         |
| 4. CBD                  | 1.7             | 2.0                    | -4.8           | 5.2                         | 0.7             | 4.9                    | -1.1           | 5.1                         | 1.0             | 3.9                    | -3.1           | 5.0                         |
| 5. CBDA                 | 1.7             | 3.7                    | -4.2           | 5.6                         | 1.3             | 4.7                    | -1.2           | 4.9                         | 1.3             | 4.2                    | -3.4           | 5.4                         |
| 6. THCV                 | 1.5             | 2.3                    | -4.1           | 4.7                         | 0.6             | 4.8                    | -1.0           | 4.9                         | 1.0             | 4.0                    | -3.0           | 5.0                         |
| 7. CBGA                 | 3.8             | 3.5                    | -1.8           | 3.9                         | 0.9             | 4.7                    | -1.2           | 4.9                         | 0.9             | 3.7                    | -3.5           | 5.1                         |
| 8. CBN                  | 0.9             | 2.6                    | -6.4           | 6.9                         | 0.6             | 5.5                    | -2.5           | 6.1                         | 1.1             | 4.6                    | -4.2           | 6.2                         |
| 9. Δ <sup>9</sup> -THC  | 1.9             | 2.6                    | -3.9           | 4.7                         | 0.5             | 5.3                    | -1.3           | 5.5                         | 1.3             | 4.2                    | -3.3           | 5.3                         |
| 10. Δ <sup>8</sup> -THC | 1.7             | 3.7                    | -4.8           | 6.0                         | 0.4             | 5.4                    | -1.4           | 5.6                         | 1.0             | 4.4                    | -3.9           | 5.9                         |
| 11. THCVA               | 3.2             | 4.0                    | -4.8           | 6.2                         | 0.7             | 4.7                    | -1.4           | 4.9                         | 1.4             | 4.4                    | -4.0           | 5.9                         |
| 12. CBC                 | 1.9             | 3.7                    | -6.3           | 7.3                         | 0.7             | 5.0                    | -1.2           | 5.2                         | 1.1             | 4.7                    | -3.5           | 5.9                         |
| 13. THCA                | 9.2             | 12.0                   | 0.1            | 12.0                        | 6.4             | 5.5                    | -1.2           | 5.6                         | 1.2             | 5.0                    | -4.2           | 6.6                         |
| 14. CBCA                | 8.5             | 8.8                    | 6.9            | 11.2                        | 1.8             | 4.7                    | 0.0            | 4.7                         | 0.9             | 3.7                    | -3.2           | 4.8                         |

**Supplementary Table 3. Matrix effect and extraction efficiency (recovery).**

| Analyte                 | Spike 0.1µg/mL        |                                            | Spike 0.5µg/mL        |                                            | Spike 1.0 µg/mL       |                                            |
|-------------------------|-----------------------|--------------------------------------------|-----------------------|--------------------------------------------|-----------------------|--------------------------------------------|
|                         | Matrix effect<br>± SD | Extraction<br>efficiency<br>(recovery± SD) | Matrix effect<br>± SD | Extraction<br>efficiency<br>(recovery± SD) | Matrix effect<br>± SD | Extraction<br>efficiency<br>(recovery± SD) |
| 1. CBDV                 | 97.96 ± 0.38          | 94.41 ± 1.36                               | 96.63 ± 1.40          | 94.52 ± 0.79                               | 96.78 ± 0.45          | 99.62 ± 4.23                               |
| 2. CBDVA                | 101.65 ± 0.18         | 87.96 ± 5.07                               | 97.63 ± 1.32          | 87.29 ± 1.09                               | 97.76 ± 0.32          | 90.05 ± 3.30                               |
| 3. CBG                  | 86.39 ± 0.73          | 98.97 ± 1.07                               | 97.98 ± 0.66          | 94.42 ± 3.89                               | 94.49 ± 0.10          | 80.04 ± 2.19                               |
| 4. CBD                  | 96.72 ± 1.88          | 95.68 ± 1.20                               | 96.11 ± 0.23          | 94.04 ± 0.50                               | 96.07 ± 0.51          | 94.26 ± 5.40                               |
| 5. CBDA                 | 98.47 ± 0.84          | 85.05 ± 3.56                               | 96.40 ± 0.82          | 87.91 ± 1.20                               | 96.58 ± 0.16          | 89.70 ± 3.26                               |
| 6. THCV                 | 96.89 ± 0.74          | 96.55 ± 1.14                               | 96.07 ± 0.63          | 94.45 ± 0.17                               | 96.04 ± 0.41          | 80.73 ± 2.19                               |
| 7. CBGA                 | 94.14 ± 5.08          | 83.96 ± 3.02                               | 96.45 ± 0.74          | 86.44 ± 1.17                               | 96.30 ± 0.34          | 89.99 ± 2.99                               |
| 8. CBN                  | 94.82 ± 1.78          | 95.71 ± 1.19                               | 93.24 ± 0.42          | 93.73 ± 0.51                               | 93.90 ± 0.39          | 77.21 ± 2.18                               |
| 9. Δ <sup>9</sup> -THC  | 97.11 ± 1.19          | 100.44 ± 1.13                              | 95.43 ± 0.57          | 95.45 ± 0.53                               | 94.60 ± 0.58          | 89.28 ± 2.29                               |
| 10. Δ <sup>8</sup> -THC | 98.13 ± 0.66          | 97.50 ± 1.00                               | 95.16 ± 0.31          | 94.73 ± 0.58                               | 94.97 ± 0.65          | 89.17 ± 2.61                               |
| 11. THCVA               | 98.55 ± 1.22          | 82.83 ± 3.95                               | 96.75 ± 1.05          | 86.49 ± 0.79                               | 95.28 ± 0.57          | 89.15 ± 3.04                               |
| 12. CBC                 | 96.94 ± 1.54          | 98.26 ± 1.32                               | 95.42 ± 0.65          | 94.46 ± 0.80                               | 94.73 ± 0.19          | 79.03 ± 1.54                               |
| 13. THCA                | 100.02 ± 16.37        | 98.28 ± 9.88                               | 96.53 ± 2.21          | 90.27 ± 1.27                               | 93.03 ± 3.22          | 88.17 ± 3.00                               |
| 14. CBCA                | 99.53 ± 0.33          | 94.30 ± 0.81                               | 96.63 ± 1.40          | 89.41 ± 0.72                               | 93.72 ± 0.60          | 82.94 ± 1.41                               |

**Supplementary Table 4. ANOVA regression statistics and LOD and LOQ for mono- and sesquiterpenoids.**

|     |                           | Quantification<br>Range ( $\mu\text{g/mL}$ ) | R <sup>2</sup> | Slope<br>$\pm$ SD   | LOD<br>( $\mu\text{g/mL}$ ) | LOQ<br>( $\mu\text{g/mL}$ ) |
|-----|---------------------------|----------------------------------------------|----------------|---------------------|-----------------------------|-----------------------------|
| 1.  | $\alpha$ -Pinene          | 1 - 250                                      | 0.9993         | 0.0043 $\pm$ 0.0001 | 0.022                       | 0.065                       |
| 2.  | Camphene                  | 1 - 250                                      | 0.9999         | 0.0093 $\pm$ 0.0000 | 0.020                       | 0.059                       |
| 3.  | Sabinene                  | 1 - 250                                      | 0.9996         | 0.0154 $\pm$ 0.0001 | 0.015                       | 0.045                       |
| 4.  | $\beta$ -Pinene           | 1 - 250                                      | 0.9994         | 0.0172 $\pm$ 0.0002 | 0.018                       | 0.054                       |
| 5.  | $\beta$ -Myrcene          | 1 - 250                                      | 0.9998         | 0.0080 $\pm$ 0.0000 | 0.014                       | 0.042                       |
| 6.  | $\alpha$ -Phellandrene    | 1 - 250                                      | 0.9998         | 0.0161 $\pm$ 0.0001 | 0.014                       | 0.043                       |
| 7.  | $\Delta^3$ -Carene        | 1 - 250                                      | 0.9996         | 0.0038 $\pm$ 0.0000 | 0.015                       | 0.044                       |
| 8.  | $\alpha$ -Terpinene       | 1 - 250                                      | 0.9997         | 0.0094 $\pm$ 0.0001 | 0.013                       | 0.038                       |
| 9.  | P-Cymene                  | 1 - 250                                      | 0.9997         | 0.0249 $\pm$ 0.0002 | 0.012                       | 0.037                       |
| 10. | Limonene                  | 1 - 250                                      | 0.9999         | 0.0069 $\pm$ 0.0000 | 0.029                       | 0.088                       |
| 11. | 1,8-Cineole (Eucalyptol)  | 1 - 250                                      | 0.9991         | 0.0020 $\pm$ 0.0000 | 0.009                       | 0.026                       |
| 12. | Ocimene                   | 1 - 250                                      | 0.9998         | 0.0073 $\pm$ 0.0000 | 0.015                       | 0.044                       |
| 13. | $\gamma$ -Terpinene       | 1 - 250                                      | 1.0000         | 0.0146 $\pm$ 0.0000 | 0.012                       | 0.035                       |
| 14. | Sabinene Hydrate          | 1 - 250                                      | 0.9997         | 0.0054 $\pm$ 0.0000 | 0.016                       | 0.049                       |
| 15. | Terpinolene               | 1 - 250                                      | 0.9996         | 0.0081 $\pm$ 0.0001 | 0.011                       | 0.033                       |
| 16. | Fenchone                  | 1 - 250                                      | 0.9995         | 0.0194 $\pm$ 0.0002 | 0.012                       | 0.035                       |
| 17. | Linalool                  | 1 - 250                                      | 0.9996         | 0.0062 $\pm$ 0.0001 | 0.046                       | 0.137                       |
| 18. | Fenchol                   | 1 - 250                                      | 0.9999         | 0.0015 $\pm$ 0.0000 | 0.012                       | 0.035                       |
| 19. | (-)-Isopulegol            | 1 - 250                                      | 1.0000         | 0.0023 $\pm$ 0.0000 | 0.012                       | 0.037                       |
| 20. | Camphor                   | 1 - 250                                      | 0.9996         | 0.0116 $\pm$ 0.0001 | 0.010                       | 0.029                       |
| 21. | Borneol                   | 1 - 250                                      | 0.9998         | 0.0036 $\pm$ 0.0000 | 0.026                       | 0.077                       |
| 22. | Terpinen-4-ol             | 1 - 250                                      | 0.9994         | 0.0112 $\pm$ 0.0001 | 0.016                       | 0.047                       |
| 23. | $\alpha$ -Terpineol       | 1 - 250                                      | 1.0000         | 0.0038 $\pm$ 0.0000 | 0.012                       | 0.035                       |
| 24. | (+)-Dihydrocarvone        | 1 - 250                                      | 0.9999         | 0.0033 $\pm$ 0.0000 | 0.012                       | 0.037                       |
| 25. | Nerol                     | 1 - 250                                      | 0.9995         | 0.0111 $\pm$ 0.0001 | 0.167                       | 0.500                       |
| 26. | Pulegone                  | 1 - 250                                      | 0.9998         | 0.0037 $\pm$ 0.0000 | 0.014                       | 0.041                       |
| 27. | (+)-Carvone               | 1 - 250                                      | 0.9999         | 0.0106 $\pm$ 0.0000 | 0.024                       | 0.072                       |
| 28. | Geraniol                  | 1 - 250                                      | 0.9991         | 0.0145 $\pm$ 0.0002 | 0.125                       | 0.375                       |
| 29. | Geranyl Acetate           | 1 - 250                                      | 0.9996         | 0.0094 $\pm$ 0.0001 | 0.022                       | 0.065                       |
| 30. | (-)- $\beta$ -Elemene     | 1 - 250                                      | 0.9999         | 0.0016 $\pm$ 0.0000 | 0.017                       | 0.051                       |
| 31. | $\beta$ -Caryophyllene    | 1 - 250                                      | 0.9997         | 0.0021 $\pm$ 0.0000 | 0.015                       | 0.045                       |
| 32. | Aromadendrene             | 1 - 250                                      | 0.9996         | 0.0020 $\pm$ 0.0000 | 0.011                       | 0.033                       |
| 33. | trans- $\beta$ -Farnesene | 1 - 250                                      | 0.9992         | 0.0105 $\pm$ 0.0001 | 0.019                       | 0.056                       |
| 34. | $\alpha$ -Humulene        | 1 - 250                                      | 0.9995         | 0.0104 $\pm$ 0.0001 | 0.013                       | 0.040                       |
| 35. | Valencene                 | 1 - 250                                      | 0.9996         | 0.0034 $\pm$ 0.0000 | 0.014                       | 0.041                       |
| 36. | Ledene                    | 1 - 250                                      | 0.9997         | 0.0014 $\pm$ 0.0000 | 0.010                       | 0.029                       |
| 37. | Trans-Nerolidol           | 1 - 250                                      | 0.9995         | 0.0024 $\pm$ 0.0000 | 0.017                       | 0.051                       |
| 38. | Caryophyllene Oxide       | 1 - 250                                      | 0.9997         | 0.0034 $\pm$ 0.0000 | 0.031                       | 0.093                       |
| 39. | Globulol                  | 1 - 250                                      | 0.9989         | 0.0017 $\pm$ 0.0000 | 0.019                       | 0.057                       |
| 40. | Viridiflorol              | 1 - 250                                      | 0.9996         | 0.0020 $\pm$ 0.0000 | 0.020                       | 0.060                       |
| 41. | (-)-Guaiol                | 1 - 250                                      | 0.9998         | 0.0043 $\pm$ 0.0000 | 0.018                       | 0.054                       |
| 42. | (+)-Cedrol                | 1 - 250                                      | 0.9997         | 0.0029 $\pm$ 0.0000 | 0.017                       | 0.051                       |
| 43. | $\beta$ -Eudesmol         | 1 - 250                                      | 0.9997         | 0.0033 $\pm$ 0.0000 | 0.028                       | 0.083                       |
| 44. | $\alpha$ -Bisabolol       | 1 - 250                                      | 0.9995         | 0.0007 $\pm$ 0.0000 | 0.011                       | 0.033                       |

Supplementary Table 5. Trueness, precision, and accuracy for mono- and sesquiterpenoids.

| Analyte                     | Spike 10 µg/mL |              |              |                | Spike 20 µg/mL |              |              |                | Spike 50 µg/mL |              |              |                |
|-----------------------------|----------------|--------------|--------------|----------------|----------------|--------------|--------------|----------------|----------------|--------------|--------------|----------------|
|                             | Repeatability  | Intermediate | Trueness     | Accuracy       | Repeatability  | Intermediate | Trueness     | Accuracy       | Repeatability  | Intermediate | Trueness     | Accuracy       |
|                             | -              | precision    | -            | -              | -              | precision    | -            | -              | -              | precision    | -            | -              |
|                             | Pooled RSD%    | RSD%         | Relative     | Uncertainty of | Pooled RSD%    | RSD%         | Relative     | Uncertainty of | Pooled RSD%    | RSD%         | Relative     | Uncertainty of |
| (n=3)                       | (n=9)          | bias%        | measurement% | (n=3)          | (n=9)          | bias%        | measurement% | (n=3)          | (n=9)          | bias%        | measurement% |                |
|                             |                | (n=9)        | (n=9)        |                |                | (n=9)        | (n=9)        |                |                | (n=9)        | (n=9)        |                |
| 1. α-Pinene                 | 1.5            | 4.1          | -3.9         | 5.7            | 1.6            | 2.8          | 0.9          | 2.9            | 1.8            | 4.4          | 1.3          | 4.6            |
| 2. Camphene                 | 1.3            | 2.0          | -0.3         | 2.0            | 1.5            | 2.4          | 3.1          | 3.9            | 1.2            | 4.0          | 2.8          | 4.9            |
| 3. Sabinene                 | 0.8            | 8.8          | 2.4          | 9.1            | 1.4            | 3.8          | 4.2          | 5.7            | 0.7            | 4.0          | 4.0          | 5.6            |
| 4. β-Pinene                 | 0.9            | 7.2          | 0.7          | 7.2            | 1.4            | 3.0          | 4.0          | 5.0            | 1.0            | 4.2          | 3.8          | 5.7            |
| 5. β-Myrcene                | 0.7            | 6.5          | 4.2          | 7.7            | 1.2            | 3.3          | 6.9          | 7.6            | 0.8            | 2.8          | 5.7          | 6.3            |
| 6. α-Phellandrene           | 0.7            | 5.1          | 0.5          | 5.1            | 1.4            | 2.8          | 3.4          | 4.4            | 1.1            | 3.5          | 4.0          | 5.4            |
| 7. Δ <sup>3</sup> -Carene   | 0.8            | 3.4          | -0.2         | 3.4            | 1.5            | 3.2          | 4.6          | 5.6            | 1.2            | 3.6          | 5.2          | 6.3            |
| 8. α-Terpinene              | 0.7            | 6.2          | 0.9          | 6.3            | 1.4            | 2.4          | 3.3          | 4.1            | 1.2            | 3.3          | 4.5          | 5.5            |
| 9. P-Cymene                 | 0.7            | 2.0          | -1.8         | 2.7            | 1.6            | 2.1          | 4.4          | 4.8            | 0.6            | 2.1          | 6.7          | 7.0            |
| 10. Limonene                | 3.7            | 4.1          | -2.4         | 4.7            | 4.5            | 4.0          | 1.8          | 4.4            | 1.9            | 4.2          | 2.3          | 4.8            |
| 11. 1,8-Cineole(Eucalyptol) | 1.2            | 7.7          | -1.8         | 7.9            | 1.2            | 2.3          | 3.4          | 4.1            | 0.7            | 1.3          | 6.0          | 6.1            |
| 12. Ocimene                 | 0.5            | 2.4          | 2.0          | 3.1            | 1.3            | 1.3          | 2.8          | 3.1            | 0.5            | 2.1          | 3.0          | 3.6            |
| 13. γ-Terpinene             | 0.5            | 3.4          | 1.0          | 3.6            | 1.2            | 2.3          | 2.5          | 3.4            | 0.7            | 4.2          | 2.4          | 4.9            |
| 14. Sabinene Hydrate        | 1.9            | 4.4          | -0.1         | 4.4            | 3.0            | 2.7          | 6.1          | 6.7            | 4.8            | 5.9          | 3.8          | 7.0            |
| 15. Terpinolene             | 0.5            | 5.0          | 0.3          | 5.1            | 1.3            | 2.0          | 3.7          | 4.2            | 0.6            | 1.3          | 5.1          | 5.2            |
| 16. Fenchone                | 1.9            | 2.8          | -3.9         | 4.8            | 1.6            | 2.3          | 4.6          | 5.2            | 0.6            | 0.6          | 7.9          | 7.9            |
| 17. Linalool                | 4.9            | 6.2          | 3.0          | 6.9            | 3.7            | 3.4          | 4.2          | 5.4            | 1.6            | 3.3          | 5.7          | 6.6            |
| 18. Fenchol                 | 1.9            | 2.8          | 4.7          | 5.4            | 1.2            | 1.1          | 7.2          | 7.3            | 0.8            | 1.0          | 8.7          | 8.8            |
| 19. (-)-Isopulegol          | 3.8            | 3.7          | 1.5          | 4.0            | 1.3            | 1.8          | 6.6          | 6.8            | 1.2            | 1.2          | 7.9          | 8.0            |
| 20. Camphor                 | 0.8            | 4.1          | 1.7          | 4.5            | 1.2            | 2.1          | 5.7          | 6.1            | 1.3            | 3.8          | 6.2          | 7.2            |
| 21. Borneol                 | 1.3            | 2.7          | 1.2          | 3.0            | 1.7            | 2.3          | 2.2          | 3.2            | 1.3            | 3.4          | 4.5          | 5.6            |
| 22. Terpinen-4-ol           | 3.9            | 5.8          | 2.9          | 6.5            | 1.2            | 4.1          | 5.8          | 7.2            | 1.5            | 2.9          | 4.7          | 5.5            |
| 23. α-Terpineol             | 0.7            | 3.2          | 0.5          | 3.2            | 1.1            | 4.1          | 5.3          | 6.7            | 1.7            | 2.4          | 6.3          | 6.7            |
| 24. (+)-Dihydrocarvone      | 1.3            | 3.8          | 0.1          | 3.8            | 1.1            | 2.7          | 3.8          | 4.7            | 1.1            | 2.2          | 6.0          | 6.4            |
| 25. Nerol                   | 2.6            | 3.6          | -1.5         | 3.9            | 6.4            | 6.0          | -1.3         | 6.2            | 3.6            | 3.6          | 4.5          | 5.7            |
| 26. Pulegone                | 3.6            | 5.2          | 3.8          | 6.4            | 3.2            | 3.4          | 5.9          | 6.9            | 1.6            | 2.7          | 5.0          | 5.7            |
| 27. (+)-Carvone             | 3.2            | 4.9          | 0.2          | 4.9            | 2.9            | 3.0          | 2.3          | 3.8            | 1.9            | 2.4          | 5.7          | 6.1            |
| 28. Geraniol                | 2.0            | 5.9          | 2.3          | 6.4            | 3.5            | 5.3          | 3.1          | 6.2            | 1.2            | 2.0          | 6.2          | 6.5            |
| 29. Geranyl Acetate         | 2.7            | 3.3          | 3.6          | 4.9            | 1.5            | 2.6          | 6.8          | 7.3            | 1.0            | 1.9          | 6.3          | 6.5            |
| 30. (-)-β-Elemene           | 0.4            | 1.5          | -0.2         | 1.5            | 1.0            | 1.1          | 3.9          | 4.0            | 1.3            | 3.5          | 6.7          | 7.5            |
| 31. β-Caryophyllene         | 0.6            | 3.1          | -4.9         | 5.8            | 0.9            | 3.4          | 3.3          | 4.7            | 0.9            | 1.1          | 6.9          | 7.0            |
| 32. Aromadendrene           | 1.4            | 1.7          | -6.3         | 6.6            | 1.1            | 5.1          | 1.0          | 5.2            | 1.2            | 1.3          | 5.9          | 6.0            |
| 33. trans-β-Farnesene       | 0.8            | 5.5          | 4.9          | 7.4            | 1.1            | 1.4          | 6.4          | 6.6            | 0.7            | 1.2          | 7.7          | 7.8            |
| 34. α-Humulene              | 2.2            | 3.8          | -4.6         | 5.9            | 3.1            | 3.0          | 1.5          | 3.3            | 1.2            | 2.2          | 5.6          | 6.1            |
| 35. Valencene               | 1.2            | 4.0          | 2.3          | 4.6            | 2.4            | 2.4          | 5.0          | 5.5            | 1.5            | 1.4          | 6.2          | 6.4            |
| 36. Ledene                  | 3.9            | 5.4          | -1.2         | 5.5            | 2.6            | 2.5          | 1.0          | 2.7            | 2.7            | 3.2          | 4.2          | 5.3            |
| 37. trans-Nerolidol         | 2.3            | 3.9          | -1.3         | 4.1            | 3.5            | 5.5          | 1.6          | 5.7            | 2.4            | 2.4          | 5.1          | 5.7            |
| 38. Caryophyllene Oxide     | 2.9            | 2.9          | 2.7          | 4.0            | 2.6            | 2.8          | 2.9          | 4.0            | 1.4            | 2.0          | 4.8          | 5.2            |
| 39. Globulol                | 2.9            | 5.8          | 1.3          | 5.9            | 3.0            | 4.1          | 2.1          | 4.6            | 2.0            | 2.0          | 4.6          | 5.0            |

---

|                         |     |     |      |     |     |     |     |     |     |     |     |     |
|-------------------------|-----|-----|------|-----|-----|-----|-----|-----|-----|-----|-----|-----|
| 40. Viridiflorol        | 2.9 | 2.7 | 5.8  | 6.4 | 2.4 | 2.8 | 5.9 | 6.6 | 2.2 | 3.3 | 5.0 | 5.9 |
| 41. (-)-Guaialol        | 4.0 | 4.4 | 1.8  | 4.7 | 3.4 | 3.6 | 1.9 | 4.0 | 3.5 | 3.5 | 4.2 | 5.4 |
| 42. (+)-Cedrol          | 2.9 | 4.0 | -0.2 | 4.0 | 2.2 | 2.9 | 3.2 | 4.3 | 2.2 | 2.0 | 6.6 | 6.9 |
| 43. $\beta$ -Eudesmol   | 2.5 | 3.0 | 4.4  | 5.3 | 2.6 | 4.0 | 4.1 | 5.7 | 1.7 | 1.7 | 6.5 | 6.7 |
| 44. $\alpha$ -Bisabolol | 1.3 | 2.3 | 6.6  | 7.0 | 2.8 | 3.6 | 4.4 | 5.7 | 1.7 | 1.8 | 6.2 | 6.5 |

---

**Supplementary Table 6. ANOVA regression statistics for flavonoids.**

|               | Quantification<br>Range ( $\mu\text{g/mL}$ ) | Correlation<br>Coefficient $R^2$ | Slope $\pm$ SD   | LOD<br>( $\mu\text{g/mL}$ ) | LOQ<br>( $\mu\text{g/mL}$ ) |
|---------------|----------------------------------------------|----------------------------------|------------------|-----------------------------|-----------------------------|
| 1. Orientin   | 1-25                                         | 1.0000                           | 21.73 $\pm$ 0.06 | 0.04                        | 0.12                        |
| 2. Vitexin    | 1-25                                         | 1.0000                           | 12.40 $\pm$ 0.03 | 0.04                        | 0.11                        |
| 3. Isovitexin | 1-25                                         | 1.0000                           | 14.99 $\pm$ 0.02 | 0.04                        | 0.13                        |
| 4. Quercetin  | 1-25                                         | 1.0000                           | 14.02 $\pm$ 0.31 | 0.08                        | 0.23                        |
| 5. Luteolin   | 1-25                                         | 1.0000                           | 15.76 $\pm$ 0.09 | 0.04                        | 0.13                        |
| 6. Kaempferol | 1-25                                         | 0.9997                           | 15.84 $\pm$ 0.21 | 0.07                        | 0.20                        |
| 7. Apigenin   | 1-25                                         | 1.0000                           | 19.48 $\pm$ 0.07 | 0.06                        | 0.17                        |

**Supplementary Table 7 Accuracy (recovery) and repeatability for flavonoids in cannabis leaf over three spiked levels**

| Spike level | Compound      | Nominal spiked mass (µg) | Mass in sample (µg) (n=3) (mean±SD) | Measured spiked mass (µg) (n=3) (mean±SD) | Recovery% (n=3) (mean±SD) | RSD% (n=3) |
|-------------|---------------|--------------------------|-------------------------------------|-------------------------------------------|---------------------------|------------|
| Level 1     | 1. Orientin   | 20                       | 34.27±0.04                          | 17.77±0.52                                | 88.8±2.6%                 | 2.9%       |
|             | 2. Vitexin    | 20                       | 75.24±0.08                          | 21.33±0.80                                | 106.6±4.0%                | 3.8%       |
|             | 3. Isovitexin | 20                       | 6.23±0.01                           | 15.87±0.36                                | 79.3±1.8%                 | 2.3%       |
|             | 4. Quercetin  | 50                       | ND                                  | 35.73±0.67                                | 71.5±1.3%                 | 1.9%       |
|             | 5. Luteolin   | 50                       | 58.10±0.07                          | 42.03±1.74                                | 84.1±3.5%                 | 4.1%       |
|             | 6. Kaempferol | 50                       | ND                                  | 36.23±0.86                                | 72.5±1.7%                 | 2.4%       |
|             | 7. Apigenin   | 50                       | 29.50±0.03                          | 40.23±0.46                                | 80.5±0.9%                 | 1.2%       |
| Level 2     | 1. Orientin   | 50                       | 34.27±0.04                          | 46.39±1.49                                | 92.8±3.0%                 | 3.2%       |
|             | 2. Vitexin    | 30                       | 79.05±0.27                          | 28.75±0.25                                | 95.8±0.8%                 | 0.9%       |
|             | 3. Isovitexin | 50                       | 6.23±0.01                           | 36.25±0.76                                | 72.5±1.5%                 | 2.1%       |
|             | 4. Quercetin  | 100                      | ND                                  | 72.07±0.64                                | 72.1±0.6%                 | 0.9%       |
|             | 5. Luteolin   | 100                      | 58.10±0.07                          | 80.02±2.57                                | 80.0±2.6%                 | 3.2%       |
|             | 6. Kaempferol | 100                      | ND                                  | 70.50±0.87                                | 70.5±0.9%                 | 1.2%       |
|             | 7. Apigenin   | 100                      | 29.50±0.03                          | 78.74±1.85                                | 78.7±1.9%                 | 2.4%       |
| Level 3     | 1. Orientin   | 80                       | 34.27±0.04                          | 75.78±1.34                                | 94.7±1.7%                 | 1.8%       |
|             | 2. Vitexin    | 80                       | 75.24±0.08                          | 75.60±1.64                                | 94.5±2.0%                 | 2.2%       |
|             | 3. Isovitexin | 80                       | 6.23±0.01                           | 63.52±1.05                                | 79.4±1.3%                 | 1.7%       |
|             | 4. Quercetin  | 150                      | ND                                  | 115.07±3.51                               | 76.7±2.3%                 | 3.0%       |
|             | 5. Luteolin   | 150                      | 58.10±0.07                          | 121.22±2.28                               | 80.8±1.5%                 | 1.9%       |
|             | 6. Kaempferol | 150                      | ND                                  | 112.67±1.10                               | 75.1±0.7%                 | 1.0%       |
|             | 7. Apigenin   | 150                      | 29.50±0.03                          | 121.69±0.85                               | 81.1±0.6%                 | 0.7%       |

**Supplementary Table 8. ANOVA regression statistics for sterols and triterpenoids.**

|                   | Quantification Range (µg/mL) | Correlation Coefficient R <sup>2</sup> | Slope ± SD    | LOD (µg/mL) | LOQ (µg/mL) |
|-------------------|------------------------------|----------------------------------------|---------------|-------------|-------------|
| 1. Campesterol    | 1.00-100                     | 0.9996                                 | 0.0134±0.0001 | 0.20        | 0.61        |
| 2. Stigmasterol   | 1.00-100                     | 0.9999                                 | 0.0129±0.0001 | 0.21        | 0.63        |
| 3. β-Sitosterol   | 1.00-100                     | 0.9989                                 | 0.0123±0.0002 | 0.26        | 0.79        |
| 4. β-Amyrin       | 1.00-100                     | 0.9992                                 | 0.0559±0.0007 | 0.17        | 0.50        |
| 5. Epifriedelanol | 1.00-100                     | 0.9989                                 | 0.0280±0.0004 | 0.25        | 0.74        |
| 6. Friedelin      | 1.00-100                     | 0.9998                                 | 0.0284±0.0002 | 0.26        | 0.78        |

**Supplementary Table 9. Trueness, precision, and accuracy for compounds for sterols and triterpenoids.**

| Analyte                  | Spike 5 µg/mL |              |              |                | Spike 10 µg/mL |              |              |                | Spike 25 µg/mL |              |              |                |
|--------------------------|---------------|--------------|--------------|----------------|----------------|--------------|--------------|----------------|----------------|--------------|--------------|----------------|
|                          | Repeatability | Intermediate | Trueness     | Accuracy       | Repeatability  | Intermediate | Trueness     | Accuracy       | Repeatability  | Intermediate | Trueness     | Accuracy       |
|                          | -             | precision    | -            | -              | -              | precision    | -            | -              | -              | precision    | -            | -              |
|                          | Pooled RSD%   | RSD%         | Relative     | Uncertainty of | Pooled RSD%    | RSD%         | Relative     | Uncertainty of | Pooled RSD%    | RSD%         | Relative     | Uncertainty of |
| (n=3)                    | (n=9)         | bias%        | measurement% | (n=3)          | (n=9)          | (n=9)        | measurement% | (n=3)          | (n=9)          | (n=9)        | measurement% | (n=9)          |
| <b>1. Campesterol</b>    | 4.9%          | 4.7%         | -2.6%        | 5.5%           | 2.3%           | 2.1%         | -1.1%        | 2.5%           | 2.3%           | 2.1%         | 0.5%         | 2.3%           |
| <b>2. Stigmasterol</b>   | 4.2%          | 4.7%         | -4.0%        | 5.8%           | 4.0%           | 3.9%         | 0.2%         | 4.0%           | 1.6%           | 1.4%         | 0.8%         | 1.8%           |
| <b>3. β-Sitosterol</b>   | 2.5%          | 2.9%         | 0.1%         | 2.5%           | 2.7%           | 3.4%         | 0.7%         | 2.8%           | 1.5%           | 1.3%         | 0.8%         | 1.7%           |
| <b>4. β-Amyrin</b>       | 4.7%          | 4.3%         | -2.8%        | 5.5%           | 1.8%           | 2.8%         | -0.8%        | 2.0%           | 2.4%           | 2.2%         | 0.1%         | 2.4%           |
| <b>5. Epifriedelanol</b> | 3.1%          | 4.5%         | -2.9%        | 4.3%           | 1.5%           | 2.2%         | 0.0%         | 1.5%           | 1.1%           | 1.1%         | 0.8%         | 1.4%           |
| <b>6. Friedelin</b>      | 3.2%          | 3.0%         | 0.4%         | 3.3%           | 2.2%           | 2.9%         | 1.4%         | 2.7%           | 3.84%          | 3.6%         | 0.1%         | 3.8%           |

**Supplementary Table 10. Cannabinoid profile in root and stem bark for three strains.**

| Compound                | Strain I root   | Strain I stem bark | Strain II root  | Strain II stem bark | Strain III root | Strain III stem bark |
|-------------------------|-----------------|--------------------|-----------------|---------------------|-----------------|----------------------|
| 1. CBDV                 | ND              | ND                 | ND              | ND                  | ND              | ND                   |
| 2. CBDVA                | ND              | ND                 | ND              | ND                  | ND              | ND                   |
| 3. CBG                  | 0.0007±0.00003% | 0.0002±0.00001%    | ND              | ND                  | 0.0001±0.00002% | 0.0001±0.00009%      |
| 4. CBD                  | ND              | ND                 | ND              | ND                  | ND              | ND                   |
| 5. CBDA                 | ND              | ND                 | ND              | ND                  | ND              | ND                   |
| 6. THCVA                | ND              | ND                 | ND              | ND                  | ND              | ND                   |
| 7. CBGA                 | ND              | 0.0001±0.00003%    | ND              | 0.0001±0.00001%     | 0.0002±0.00001% | 0.0001±0.00001%      |
| 8. CBN                  | ND              | 0.0001±0.00001%    | ND              | ND                  | ND              | 0.0001±0.00001%      |
| 9. Δ <sup>9</sup> -THC  | 0.0001±0.00008% | 0.0006±0.00008%    | ND              | 0.0003±0.00001%     | 0.0001±0.00001% | 0.0010±0.0002%       |
| 10. Δ <sup>8</sup> -THC | 0.0001±0.00016% | 0.0001±0.00005%    | 0.0001±0.00001% | ND                  | ND              | 0.0001±0.00004%      |
| 11. THCVA               | 0.0001±0.00004% | 0.0002±0.00002%    | 0.0001±0.00001% | 0.0001±0.00002%     | 0.0001±0.00001% | 0.0002±0.00004%      |
| 12. CBC                 | ND              | 0.0001±0.00001%    | ND              | ND                  | ND              | 0.0001±0.00009%      |
| 13. THCA                | 0.0016±0.0004%  | 0.0058±0.0005%     | 0.0008±0.00001% | 0.0040±0.0003%      | 0.0037±0.0002%  | 0.0062±0.0008%       |
| 14. CBCA                | 0.0001±0.00005% | 0.0003±0.00005%    | ND              | 0.0003±0.00005%     | 0.0001±0.00001% | 0.0004±0.00009%      |
| Total THC**             | 0.0015±0.0005%  | 0.0056±0.0005%     | 0.0007±0.00002% | 0.0038±0.0003%      | 0.0034±0.00004% | 0.0064±0.00082%      |
| Total CBD**             | 0.0001±0.00001% | 0.0001±0.00001%    | ND              | ND                  | ND              | 0.0001±0.00001%      |
| Total cannabinoids      | 0.0027±0.0006%  | 0.0074±0.0008%     | 0.0011±0.00005% | 0.0050±0.00007%     | 0.0043±0.00007% | 0.0083±0.001%        |

\* Content expressed in mean ± SD% (n=3). ND=Not detected.

**Supplementary Table 11. Cannabinoid profile in leaves and inflorescences for three strains.**

| Compound                | Strain I leaf  | Strain I inflorescence | Strain II leaf | Strain II inflorescence | Strain III leaf | Strain III inflorescence |
|-------------------------|----------------|------------------------|----------------|-------------------------|-----------------|--------------------------|
| 1. CBDV                 | ND             | ND                     | ND             | ND                      | ND              | ND                       |
| 2. CBDVA                | ND             | ND                     | ND             | ND                      | ND              | 0.05 ± 0.003%            |
| 3. CBG                  | ND             | 0.08 ± 0.004%          | ND             | 0.18 ± 0.01%            | ND              | 0.03 ± 0.001%            |
| 4. CBD                  | ND             | ND                     | ND             | ND                      | 0.02 ± 0.001%   | 0.33 ± 0.02%             |
| 5. CBDA                 | ND             | 0.04 ± 0.001%          | ND             | 0.04 ± 0.002%           | 1.16 ± 0.02%    | 12.06 ± 0.84%            |
| 6. THCVA                | ND             | ND                     | ND             | ND                      | ND              | ND                       |
| 7. CBGA                 | 0.02 ± 0.001%* | 0.26 ± 0.01%           | 0.02 ± 0.001%  | 0.37 ± 0.04%            | 0.02 ± 0.001%   | 0.35 ± 0.03%             |
| 8. CBN                  | ND             | ND                     | ND             | ND                      | ND              | ND                       |
| 9. Δ <sup>9</sup> -THC  | 0.05 ± 0.002%  | 0.24 ± 0.003%          | 0.06 ± 0.003%  | 0.30 ± 0.02%            | 0.03 ± 0.001%   | 0.47 ± 0.02%             |
| 10. Δ <sup>8</sup> -THC | ND             | ND                     | ND             | ND                      | ND              | ND                       |
| 11. THCVA               | 0.02 ± 0.001%  | 0.09 ± 0.004%          | 0.01 ± 0.001%  | 0.13 ± 0.007%           | ND              | 0.02 ± 0.001%            |
| 12. CBC                 | ND             | ND                     | ND             | ND                      | ND              | 0.04 ± 0.002%            |
| 13. THCA                | 1.01 ± 0.02%   | 14.68 ± 0.07%          | 0.68 ± 0.02%   | 18.55 ± 0.70%           | 0.62 ± 0.01%    | 6.32 ± 0.44%             |
| 14. CBCA                | 0.29 ± 0.005%  | 0.39 ± 0.002%          | 0.34 ± 0.01%   | 0.79 ± 0.05%            | 0.25 ± 0.01%    | 0.24 ± 0.02%             |
| Total THC**             | 0.93 ± 0.01%   | 13.11 ± 0.06%          | 0.65 ± 0.02%   | 16.57 ± 0.63%           | 0.57 ± 0.01%    | 6.02 ± 0.40%             |
| Total CBD**             | ND             | 0.03 ± 0.001%          | ND             | 0.04 ± 0.002%           | 1.04 ± 0.02%    | 10.91 ± 0.75%            |
| Total cannabinoids      | 1.42 ± 0.023%  | 15.77 ± 0.81%          | 1.10 ± 0.04%   | 20.37 ± 0.80%           | 2.10 ± 0.04%    | 19.93 ± 1.36%            |

\* Content expressed in mean (n=3) ± SD%. ND=Not detected.

\*\* <sup>1</sup> Total THC = THC + 0.877× THCA, Total CBD = CBD + 0.877× CBDA

**Supplementary Table 12 Mono- and sesquiterpenoid profile in cannabis leaf and inflorescence for three cannabis strains**

| Compound                         | LRI   | LRI               | Strain I       | Strain I      | Strain II     | Strain II     | Strain III    | Strain III    |
|----------------------------------|-------|-------------------|----------------|---------------|---------------|---------------|---------------|---------------|
|                                  | Calc. | Lit. <sup>a</sup> | Leaf           | inflorescence | Leaf          | inflorescence | Leaf          | inflorescence |
| 1. α-Pinene                      | 934   | 932               | 0.004±0.0002%* | 0.067±0.002%  | 0.002±0.0001% | 0.117±0.006%  | 0.083±0.003%  | 0.463±0.006%  |
| 2. Camphene                      | 948   | 952               | ND             | 0.008±0.0001% | ND            | 0.011±0.0006% | ND            | ND            |
| 3. Sabinene                      | 974   | 976               | 0.001±0.0001%  | ND            | 0.001±0.0001% | ND            | ND            | ND            |
| 4. β-Pinene                      | 978   | 980               | 0.002±0.0001%  | 0.047±0.001%  | 0.001±0.000%  | 0.071±0.005%  | 0.020±0.0007% | 0.124±0.007%  |
| 5. β-Myrcene                     | 992   | 992               | 0.001±0.0001%  | 0.274±0.013%  | ND            | 0.359±0.016%  | 0.024±0.0007% | 0.302±0.011%  |
| 6. α-Phellandrene                | 1006  | 1006              | ND             | ND            | ND            | ND            | ND            | ND            |
| 7. Δ <sup>3</sup> -Carene        | 1011  | 1011              | ND             | ND            | ND            | ND            | ND            | ND            |
| 8. α-Terpinene                   | 1017  | 1017              | ND             | ND            | ND            | ND            | ND            | ND            |
| 9. P-Cymene                      | 1025  | 1026              | ND             | ND            | ND            | ND            | ND            | ND            |
| 10. Limonene                     | 1029  | 1031              | ND             | 0.252±0.004%  | 0.004±0.0001% | 0.322±0.015%  | 0.005±0.0002% | 0.049±0.002%  |
| 11. 1,8-Cineole (Eucalyptol)     | 1031  | 1032              | 0.006±0.0016%  | ND            | 0.006±0.001%  | 0.006±0.0003% | ND            | ND            |
| 12. Ocimene                      | 1047  | 1050              | ND             | 0.047±0.006%  | ND            | 0.045±0.003%  | ND            | 0.002±0.0001% |
| 13. γ-Terpinene                  | 1058  | 1059              | ND             | ND            | ND            | ND            | ND            | ND            |
| 14. Sabinene Hydrate             | 1069  | 1068              | ND             | 0.003±0.0001% | 0.001±0.0002% | 0.004±0.0005% | ND            | 0.003±0.0003% |
| 15. Terpinolene                  | 1089  | 1088              | ND             | 0.003±0.0001% | ND            | 0.003±0.0001% | ND            | 0.001±0.0001% |
| 16. Fenchone                     | 1088  | 1088              | ND             | 0.003±0.0001% | ND            | 0.003±0.0001% | ND            | 0.002±0.0002% |
| 17. Linalool                     | 1103  | 1100              | ND             | 0.037±0.005%  | 0.001±0.0001% | 0.064±0.006%  | ND            | 0.027±0.002%  |
| 18. Fenchol                      | 1117  | 1112              | ND             | 0.023±0.001%  | ND            | 0.040±0.004%  | ND            | 0.009±0.0009% |
| 19. (-)-Isopulegol               | 1146  | 1146              | ND             | 0.002±0.0001% | ND            | 0.004±0.0005% | ND            | 0.002±0.0002% |
| 20. Camphor                      | 1143  | 1143              | ND             | ND            | ND            | ND            | ND            | ND            |
| 21. Borneol                      | 1168  | 1168              | ND             | 0.004±0.0002% | ND            | 0.007±0.0007% | ND            | 0.005±0.0004% |
| 22. Terpinen-4-ol                | 1179  | 1179              | ND             | 0.001±0.0001% | ND            | 0.001±0.0001% | ND            | 0.001±0.0001% |
| 23. α-Terpineol                  | 1194  | 1190              | ND             | 0.024±0.001%  | ND            | 0.040±0.004%  | ND            | 0.013±0.0005% |
| 24. (+)-Dihydrocarvone           | 1197  | 1200              | ND             | ND            | ND            | ND            | ND            | ND            |
| 25. Nerol                        | 1232  | 1228              | ND             | ND            | ND            | ND            | ND            | ND            |
| 26. Pulegone                     | 1239  | 1244              | ND             | ND            | ND            | ND            | ND            | ND            |
| 27. (+)-Carvone                  | 1245  | 1243              | ND             | ND            | ND            | ND            | ND            | ND            |
| 28. Geraniol                     | 1258  | 1256              | ND             | 0.001±0.001%  | ND            | 0.001±0.0002% | ND            | ND            |
| 29. Geranyl Acetate              | 1385  | -                 | ND             | ND            | ND            | ND            | ND            | ND            |
| Total monoterpeneoids            | -     | -                 | 0.014±0.002%   | 0.796±0.008%  | 0.016±0.002%  | 1.097±0.045%  | 0.132±0.005%  | 1.004±0.043%  |
| 30. (-)-β-Elementene             | 1394  | 1392              | ND             | ND            | ND            | ND            | ND            | ND            |
| 31. β-Caryophyllene              | 1420  | 1420              | 0.077±0.003%   | 0.416±0.030%  | 0.057±0.002%  | 0.538±0.034%  | 0.053±0.0024% | 0.086±0.002%  |
| 32. Aromadendrene                | 1440  | 1440              | ND             | ND            | ND            | ND            | ND            | ND            |
| 33. trans-β-Farnesene            | 1459  | 1446              | 0.032±0.003%   | 0.106±0.002%  | 0.021±0.002%  | 0.106±0.008%  | 0.034±0.002%  | 0.035±0.001%  |
| 34. α-Humulene                   | 1455  | 1455              | 0.025±0.001%   | 0.123±0.006%  | 0.022±0.0007% | 0.193±0.019%  | 0.021±0.001%  | 0.036±0.002%  |
| <b>β - selinene</b>              | 1485  | 1485              | ND             | 0.043±0.001%  | ND            | 0.046±0.001%  | ND            | 0.034±0.001%  |
| <b>α - selinene</b>              | 1494  | 1496              | ND             | 0.037±0.001%  | ND            | 0.036±0.001%  | ND            | 0.026±0.001%  |
| 35. Valencene                    | 1494  | 1491              | ND             | ND            | ND            | ND            | ND            | 0.001±0.001%  |
| 36. Ledene                       | 1497  | 1493              | ND             | 0.011±0.0004% | ND            | 0.013±0.0009% | ND            | 0.005±0.0004% |
| <b>α - Farnesene</b>             | 1508  | 1508              | ND             | 0.017±0.001%  | ND            | 0.025±0.001%  | ND            | 0.024±0.001%  |
| 37. trans-Nerolidol              | 1568  | 1565              | 0.012±0.003%   | 0.048±0.014%  | 0.009±0.0005% | 0.166±0.014%  | 0.004±0.0004% | 0.009±0.001%  |
| 38. Caryophyllene Oxide          | 1584  | 1583              | ND             | 0.006±0.0003% | ND            | 0.005±0.0008% | ND            | 0.002±0.0001% |
| 39. Globulol                     | 1588  | 1584              | ND             | 0.002±0.0001% | ND            | 0.001±0.0001% | ND            | ND            |
| 40. Viridiflorol                 | 1595  | 1588              | ND             | ND            | ND            | ND            | ND            | ND            |
| 41. (-)-Guaiol                   | 1602  | 1602              | ND             | ND            | ND            | ND            | 0.007±0.0003% | 0.027±0.0009% |
| 42. (+)-Cedrol                   | 1605  | 1601              | ND             | ND            | ND            | ND            | ND            | ND            |
| 43. β-Eudesmol                   | 1651  | 1650              | ND             | 0.001±0.0002% | ND            | 0.002±0.0001% | 0.004±0.0002% | 0.034±0.001%  |
| <b>α -Eudesmol</b>               | 1653  | 1657              | ND             | 0.002±0.0001% | ND            | 0.002±0.0002% | 0.003±0.0002% | 0.026±0.001%  |
| 44. α-Bisabolol                  | 1685  | 1684              | 0.013±0.002%   | 0.027±0.005%  | ND            | 0.002±0.0006% | 0.020±0.002%  | 0.018±0.0006% |
| Total sesquiterpenoids           | -     | -                 | 0.159±0.005%   | 0.741±0.035%  | 0.109±0.004%  | 1.044±0.043%  | 0.146±0.008%  | 0.279±0.011%  |
| Total mono- and sesquiterpenoids | -     | -                 | 0.173±0.007%   | 1.537±0.043%  | 0.125±0.005%  | 2.141±0.102%  | 0.278±0.011%  | 1.283±0.018%  |

\* Terpenoid content expressed in mean ± SD% (n=3). Bolded terpenoid was semi-quantified by GC-FID. ND=Not detected

<sup>a</sup> LRI from the literature<sup>2-4</sup>.

**Supplementary Table 13. Mono- and sesquiterpenoid ratios relative to total terpenoids in leaves and inflorescences**

| Compound                         | LRI   |                   | Strain I    |               | Strain II   |               | Strain III  |               |
|----------------------------------|-------|-------------------|-------------|---------------|-------------|---------------|-------------|---------------|
|                                  | Calc. | Lit. <sup>a</sup> | Leaf        | inflorescence | Leaf        | inflorescence | Leaf        | inflorescence |
| 1. α-Pinene                      | 934   | 932               | 2.37±0.22%* | 4.36±0.04%    | 1.82±0.07%  | 5.46±0.17%    | 29.81±0.75% | 36.07±0.84%   |
| 2. Camphene                      | 948   | 952               | 0.18±0.015% | 0.51±0.01%    | 0.17±0.01%  | 0.51±0.02%    | ND          | ND            |
| 3. Sabinene                      | 974   | 976               | 0.30±0.05%  | ND            | 0.56±0.05%  | ND            | ND          | ND            |
| 4. β-Pinene                      | 978   | 980               | 1.08±0.06%  | 3.04±0.02%    | 0.89±0.02%  | 3.31±0.13%    | 7.12±0.16%  | 9.67±0.16%    |
| 5. β-Myrcene                     | 992   | 992               | 0.52±0.07%  | 17.82±0.65%   | ND          | 16.78±0.99%   | 8.74±0.16%  | 23.57±0.08%   |
| 6. α-Phellandrene                | 1006  | 1006              | ND          | ND            | ND          | ND            | ND          | ND            |
| 7. Δ <sup>3</sup> -Carene        | 1011  | 1011              | ND          | ND            | 0.21±0.05%  | ND            | ND          | ND            |
| 8. α-Terpinene                   | 1017  | 1017              | 0.11±0.02%  | ND            | ND          | ND            | ND          | ND            |
| 9. P-Cymene                      | 1025  | 1026              | ND          | ND            | 0.23±0.03%  | ND            | ND          | ND            |
| 10. Limonene                     | 1029  | 1031              | ND          | 16.42±0.59%   | 0.74±0.14%  | 15.03±0.62%   | 1.77±0.06%  | 3.79±0.04%    |
| 11. 1,8-Cineole (Eucalyptol)     | 1031  | 1032              | 3.19±0.80%  | ND            | 4.56±0.73%  | 0.28±0.04%    | ND          | 0.03±0.01%    |
| 12. Ocimene                      | 1047  | 1050              | ND          | 3.07±0.32%    | ND          | 2.08±0.04%    | ND          | 0.19±0.01%    |
| 13. γ-Terpinene                  | 1058  | 1059              | 0.14±0.01%  | ND            | 0.23±0.03%  | ND            | ND          | ND            |
| 14. Sabinene Hydrate             | 1069  | 1068              | ND          | 0.22±0.01%    | 0.74±0.14%  | 0.02±10.57%   | ND          | 0.27±0.02%    |
| 15. Terpinolene                  | 1089  | 1088              | ND          | 0.16±0.01%    | ND          | 0.15±0.01%    | ND          | 0.07±0.001%   |
| 16. Fenchone                     | 1088  | 1088              | ND          | 0.22±0.001%   | ND          | 0.16±0.001%   | ND          | 0.13±0.01%    |
| 17. Linalool                     | 1103  | 1100              | ND          | 2.41±0.07%    | ND          | 2.99±0.19%    | ND          | 2.10±0.21%    |
| 18. Fenchol                      | 1117  | 1112              | ND          | 1.46±0.01%    | ND          | 1.85±0.11%    | ND          | 0.72±0.06%    |
| 19. (-)-Isopulegol               | 1146  | 1146              | ND          | 0.15±0.001%   | ND          | 0.17±0.01%    | ND          | 0.12±0.01%    |
| 20. Camphor                      | 1143  | 1143              | ND          | ND            | ND          | ND            | ND          | ND            |
| 21. Borneol                      | 1168  | 1168              | ND          | 0.29±0.01%    | ND          | 0.32±0.02%    | ND          | 0.40±0.02%    |
| 22. Terpinen-4-ol                | 1179  | 1179              | ND          | 0.06±0.001%   | ND          | 0.05±0.001%   | ND          | 0.06±0.01%    |
| 23. α-Terpineol                  | 1194  | 1190              | ND          | 1.56±0.05%    | ND          | 1.86±0.15%    | ND          | 1.04±0.03%    |
| 24. (+)-Dihydrocarvone           | 1197  | 1200              | ND          | ND            | ND          | ND            | ND          | ND            |
| 25. Nerol                        | 1232  | 1228              | ND          | ND            | ND          | ND            | ND          | ND            |
| 26. Pulegone                     | 1239  | 1244              | ND          | ND            | ND          | ND            | ND          | ND            |
| 27. (+)-Carvone                  | 1245  | 1243              | ND          | ND            | ND          | ND            | ND          | 0.02±0.001%   |
| 28. Geraniol                     | 1258  | 1256              | ND          | 0.04±0.001%   | ND          | 0.05±0.001%   | ND          | ND            |
| 29. Geranyl Acetate              | 1385  | -                 | ND          | ND            | ND          | ND            | ND          | ND            |
| Total monoterpenoids             | -     | -                 | 7.91±0.72%  | 51.8±0.94%    | 12.93±0.82% | 51.25±1.55%   | 47.45±1.12% | 78.25±0.65%   |
| 30. (-)-β-Elementene             | 1394  | 1392              | ND          | ND            | ND          | ND            | ND          | ND            |
| 31. β-Caryophyllene              | 1420  | 1420              | 44.61±0.74% | 27.09±0.35%   | 45.25±0.78% | 25.14±0.70%   | 19.25±0.34% | 6.71±0.19%    |
| 32. Aromadendrene                | 1440  | 1440              | ND          | ND            | ND          | ND            | ND          | ND            |
| 33. trans-β-Farnesene            | 1459  | 1446              | 18.75±2.23% | 6.87±0.09%    | 17.12±1.3%  | 4.96±0.31%    | 12.17±0.06% | 2.73±0.05%    |
| 34. α-Humulene                   | 1455  | 1455              | 14.22±0.19% | 7.97±0.18%    | 17.34±0.85% | 9.01±0.52%    | 7.68±0.22%  | 2.82±0.09%    |
| <b>β - selinene</b>              | 1485  | 1485              | ND          | 0.04±0.001%   | ND          | 0.05±0.001%   | ND          | 0.03±0.001%   |
| <b>α - selinene</b>              | 1494  | 1496              | ND          | 0.04±0.001%   | ND          | 0.04±0.001%   | ND          | 0.03±0.001%   |
| 35. Valencene                    | 1494  | 1491              | ND          | ND            | ND          | ND            | ND          | 0.06±0.001%   |
| 36. Ledene                       | 1497  | 1493              | ND          | 0.74±0.01%    | ND          | 0.63±0.03%    | ND          | 0.39±0.03%    |
| <b>α - Farnesene</b>             | 1508  | 1508              | ND          | 0.02±0.01%    | ND          | 0.03±0.001%   | ND          | 0.02±0.001%   |
| 37. trans-Nerolidol              | 1568  | 1565              | 7.07±1.51%  | 3.11±0.46%    | 7.35±0.38%  | 7.73±0.64%    | 1.49±0.14%  | 0.67±0.09%    |
| 38. Caryophyllene Oxide          | 1584  | 1583              | ND          | 0.38±0.01%    | ND          | 0.25±0.02%    | ND          | 0.16±0.01%    |
| 39. Globulol                     | 1588  | 1584              | ND          | 0.10±0.001%   | ND          | 0.06±0.001%   | ND          | ND            |
| 40. Viridiflorol                 | 1595  | 1588              | ND          | ND            | ND          | ND            | ND          | ND            |
| 41. (-)-Guaïol                   | 1602  | 1602              | ND          | ND            | ND          | ND            | 2.36±0.05%  | 2.12±0.05%    |
| 42. (+)-Cedrol                   | 1605  | 1601              | ND          | ND            | ND          | ND            | ND          | 0.02±0.001%   |
| 43. β-Eudesmol                   | 1651  | 1650              | ND          | 0.07±0.01%    | ND          | 0.07±0.02%    | 1.50±0.04%  | 2.64±0.11%    |
| <b>α -Eudesmol</b>               | 1653  | 1657              | ND          | 0.10±0.02%    | ND          | 0.08±0.01%    | 0.90±0.09%  | 2.01±0.10%    |
| 44. α-Bisabolol                  | 1685  | 1684              | 7.42±0.65%  | 1.76±0.01%    | ND          | 0.82±0.11%    | 7.20±0.63%  | 1.42±0.09%    |
| Total sesquiterpenoids           | -     | -                 | 92.08±0.72% | 48.20±0.94%   | 87.07±0.82% | 48.75±1.55%   | 52.55±1.12% | 21.75±0.65%   |
| Total mono- and sesquiterpenoids | -     | -                 | 100%        | 100%          | 100%        | 100%          | 100%        | 100%          |

\* Terpenoid ratio (relative to total terpenoid) is expressed as mean value ± SD% (n=3). ND= Not detected. Bolded entries were semi-quantified by relative area by GC-FID.

<sup>a</sup> LRI from the literature<sup>2-4</sup>.

**Supplementary Table 14** Flavonoid profile in cannabis

| Compound                 | Orientin         | Vitexin          | Isovitexin         | Quercetin        | Luteolin         | Kaempferol        | Apigenin          | Total flavonoids |
|--------------------------|------------------|------------------|--------------------|------------------|------------------|-------------------|-------------------|------------------|
| Strain I leaf            | 0.08±<br>0.003%  | 0.12±<br>0.008%  | 0.01±<br>0.004%    | ND               | 0.09±<br>0.008%  | ND                | 0.05±<br>0.004%   | 0.34±<br>0.02%   |
| Strain II leaf           | 0.07±<br>0.002%  | 0.17±<br>0.005%  | 0.02±<br>0.002%    | ND               | 0.10±<br>0.01%   | ND                | 0.07±<br>0.006%   | 0.44±<br>0.02%   |
| Strain III leaf          | 0.07±<br>0.002%  | 0.13±<br>0.004%  | 0.05±<br>0.001%    | ND               | 0.05±<br>0.002%  | ND                | 0.03±<br>0.001%   | 0.40±<br>0.009%  |
| Strain I inflorescence   | 0.01±<br>0.0003% | 0.02±<br>0.0006% | 0.002±<br>0.00005% | 0.01±<br>0.0003% | 0.01±<br>0.0004% | 0.01±<br>0.0002%  | 0.004±<br>0.0002% | 0.07±<br>0.001%  |
| Strain II inflorescence  | 0.02±<br>0.001%  | 0.03±<br>0.002%  | 0.002±<br>0.0001%  | 0.01±<br>0.0004% | 0.02±<br>0.001%  | 0.01±<br>0.0002%  | 0.01±<br>0.0004%  | 0.10±<br>0.005%  |
| Strain III inflorescence | 0.03±<br>0.0001% | 0.06±<br>0.0008% | 0.01±<br>0.0001%   | 0.01±<br>0.0008% | 0.02±<br>0.0001% | 0.005±<br>0.0003% | 0.01±<br>0.0003%  | 0.14±<br>0.002%  |

\* Content expressed in mean ± SD% (n=3). ND = Not detected.

**Supplementary Table 15** Sterol profile in cannabis

| Compound             | Campesterol     | Stigmasterol    | β-sitosterol    | Total sterols  |
|----------------------|-----------------|-----------------|-----------------|----------------|
| Strain I root        | 0.016 ± 0.001%  | 0.010 ± 0.001%  | 0.051 ± 0.004%  | 0.077 ± 0.005% |
| Strain II root       | 0.020 ± 0.001%  | 0.009 ± 0.0005% | 0.058 ± 0.003%  | 0.088 ± 0.004% |
| Strain III root      | 0.010 ± 0.0004% | 0.013 ± 0.001%  | 0.040 ± 0.001%  | 0.063 ± 0.002% |
| Strain I stem bark   | 0.016 ± 0.001%  | 0.011 ± 0.0003% | 0.044 ± 0.002%  | 0.071 ± 0.003% |
| Strain II stem bark  | 0.016 ± 0.001%  | 0.008 ± 0.0004% | 0.044 ± 0.003%  | 0.069 ± 0.004% |
| Strain III stem bark | 0.017 ± 0.0005% | 0.010 ± 0.001%  | 0.050 ± 0.007%  | 0.076 ± 0.006% |
| Strain I leaf        | ND              | 0.026 ± 0.003%  | 0.027 ± 0.001%  | 0.053 ± 0.003% |
| Strain II leaf       | ND              | 0.030 ± 0.002%  | 0.022 ± 0.0004% | 0.052 ± 0.002% |
| Strain III leaf      | ND              | 0.030 ± 0.001%  | 0.024 ± 0.0002% | 0.053 ± 0.001% |

\* Content expressed in mean ± SD% (n=3). ND = Not detected.

**Supplementary Table 16** Triterpenoid profile in cannabis

| Compound             | β-Amyrin        | Epifriedelanol | Friedelin      | Total triterpenoids |
|----------------------|-----------------|----------------|----------------|---------------------|
| Strain I root        | 0.006 ± 0.0003% | 0.043 ± 0.004% | 0.083 ± 0.007% | 0.132 ± 0.011%      |
| Strain II root       | 0.005 ± 0.0001% | 0.033 ± 0.001% | 0.091 ± 0.004% | 0.128 ± 0.005%      |
| Strain III root      | 0.013 ± 0.001%  | 0.092 ± 0.003% | 0.135 ± 0.003% | 0.239 ± 0.006%      |
| Strain I stem bark   | 0.006 ± 0.001%  | 0.013 ± 0.001% | 0.033 ± 0.004% | 0.052 ± 0.006%      |
| Strain II stem bark  | 0.006 ± 0.001%  | 0.021 ± 0.002% | 0.065 ± 0.007% | 0.092 ± 0.010%      |
| Strain III stem bark | 0.007 ± 0.0004% | 0.041 ± 0.002% | 0.100 ± 0.004% | 0.149 ± 0.007%      |
| Strain I leaf        | 0.026 ± 0.002%  | ND             | ND             | 0.026 ± 0.002%      |
| Strain II leaf       | 0.024 ± 0.001%  | ND             | ND             | 0.024 ± 0.001%      |
| Strain III leaf      | 0.012 ± 0.001%  | ND             | ND             | 0.012 ± 0.001%      |

\* Content expressed in mean ± SD% (n=3). ND = Not detected.

**Supplementary Table 17. Chemical profile of cannabis plant parts**

|                                         | Root          | Stem bark     | Leaf          | Inflorescence   |
|-----------------------------------------|---------------|---------------|---------------|-----------------|
| <b>Total cannabinoids</b>               | -*            | -             | 1.10% - 2.10% | 15.77% - 20.37% |
| <b>Total mono- and sesquiterpenoids</b> | -             | -             | 0.13% - 0.28% | 1.28% - 2.14%   |
| <b>Total triterpenoids</b>              | 0.13% - 0.24% | 0.05% - 0.15% | -             | -               |
| <b>Total sterols</b>                    | 0.06% - 0.09% | 0.07 - 0.08%  | 0.05% - 0.05% | -               |
| <b>Total flavonoids</b>                 | -             | -             | 0.34% - 0.44% | 0.07% - 0.14%   |

\* Less than 0.05%.

**Supplementary Table 18.** SIM method parameters for cannabinoids

| Name                       | Retention Time (min) | POS/NEG | Quantifier |
|----------------------------|----------------------|---------|------------|
| IS: $\Delta^9$ -THC- $d_3$ | 16.059               | POS     | 318.3      |
| 1. CBDV                    | 8.102                | POS     | 287.2      |
| 2. CBDVA                   | 9.256                | POS     | 331.2      |
| 3. CBG                     | 11.263               | POS     | 317.3      |
| 4. CBD                     | 11.410               | POS     | 315.3      |
| 5. CBDA                    | 12.181               | POS     | 359.2      |
| 6. THCV                    | 12.393               | POS     | 287.2      |
| 7. CBGA                    | 13.539               | POS     | 343.3      |
| 8. CBN                     | 15.048               | POS     | 311.2      |
| 9. $\Delta^9$ -THC         | 16.471               | POS     | 315.3      |
| 10. $\Delta^9$ -THC        | 17.156               | POS     | 315.3      |
| 11. THCVA                  | 17.282               | POS     | 331.2      |
| 12. CBC                    | 18.398               | POS     | 315.2      |
| 13. THCA                   | 22.350               | POS     | 359.3      |
| 14. CBCA                   | 23.722               | POS     | 359.3      |

**Supplementary Table 19.** SIM method parameters for flavonoids

| Name          | Retention Time (min) | POS/NEG | Quantifier |
|---------------|----------------------|---------|------------|
| 1. Orientin   | 15.393               | NEG     | 447        |
| 2. Vitexin    | 19.444               | NEG     | 431        |
| 3. Isovitexin | 21.643               | NEG     | 431        |
| 4. Quercetin  | 36.288               | NEG     | 301        |
| 5. Luteolin   | 40.932               | NEG     | 285        |
| 6. Kaempferol | 44.875               | NEG     | 285        |
| 7. Apigenin   | 48.708               | NEG     | 269        |

**Supplementary Table 20.** SIM method parameters for monoterpenoids and sesquiterpenoids

|                               | Retention Time (min) | Quantifier | Qualifier 1 | Qualifier 2 | Qualifier 3 |
|-------------------------------|----------------------|------------|-------------|-------------|-------------|
| IS: tridecane                 | 11.497               | 71         | 85          | 57          |             |
| 1. $\alpha$ -Pinene           | 5.597                | 77         | 91          | 121         |             |
| 2. Camphene                   | 5.787                | 93         | 121         | 136         |             |
| 3. Sabinene                   | 6.073                | 93         | 77          | 79          | 136         |
| 4. $\beta$ -Pinene            | 6.132                | 93         | 69          | 77          | 136         |
| 5. $\beta$ -Myrcene           | 6.242                | 69         | 79          | 136         |             |
| 6. $\alpha$ -Phellandrene     | 6.462                | 93         | 77          | 91          | 136         |
| 7. $\Delta^3$ -Carene         | 6.542                | 77         | 91          | 121         |             |
| 8. $\alpha$ -Terpinene        | 6.621                | 121        | 91          | 93          | 136         |
| 9. <i>p</i> -Cymene           | 6.732                | 119        | 91          | 134         |             |
| 10. Limonene                  | 6.790                | 93         | 121         | 136         |             |
| 11. 1,8-Cineole (Eucalyptol)  | 6.835                | 154        | 93          | 139         |             |
| 12. Ocimene                   | 7.004                | 93         | 79          | 121         |             |
| 13. $\gamma$ -Terpinene       | 7.207                | 93         | 77          | 121         | 136         |
| 14. Sabinene Hydrate          | 7.373                | 71         | 93          | 121         | 154         |
| 15. Terpinolene               | 7.662                | 93         | 121         | 136         |             |
| 16. Fenchone                  | 7.685                | 81         | 69          | 152         |             |
| 17. Linalool                  | 7.816                | 93         | 69          | 121         |             |
| 18. Fenchol                   | 8.145                | 93         | 111         | 121         |             |
| 19. (-)-Isopulegol            | 8.656                | 121        | 136         | 154         |             |
| 20. Camphor                   | 8.646                | 95         | 108         | 152         |             |
| 21. Borneol                   | 9.064                | 110        | 67          | 139         |             |
| 22. Terpinen-4-ol             | 9.238                | 71         | 93          | 111         | 154         |
| 23. $\alpha$ -Terpineol       | 9.492                | 121        | 59          | 136         |             |
| 24. (+)-Dihydrocarvone        | 9.569                | 95         | 109         | 137         | 152         |
| 25. Nerol                     | 10.120               | 69         | 93          | 121         |             |
| 26. Pulegone                  | 10.398               | 109        | 67          | 152         |             |
| 27. (+)-Carvone               | 10.485               | 82         | 93          | 108         |             |
| 28. Geraniol                  | 10.613               | 69         | 93          | 123         |             |
| 29. Geranyl Acetate           | 13.309               | 69         | 93          | 121         |             |
| 30. (-)- $\beta$ -Elemene     | 13.665               | 147        | 161         | 189         |             |
| 31. $\beta$ -Caryophyllene    | 14.339               | 105        | 91          | 79          |             |
| 32. Aromadendrene             | 14.775               | 161        | 189         | 204         |             |
| 33. trans- $\beta$ -Farnesene | 14.988               | 69         | 93          | 133         |             |
| 34. $\alpha$ -Humulene        | 15.100               | 93         | 79          | 91          |             |
| 35. Valencene                 | 15.974               | 161        | 189         | 204         |             |
| 36. Ledene                    | 16.000               | 161        | 189         | 204         |             |
| 37. trans-Nerolidol           | 17.406               | 93         | 107         | 136         |             |
| 38. Caryophyllene Oxide       | 17.851               | 95         | 105         | 107         |             |
| 39. Globulol                  | 17.889               | 161        | 189         | 204         |             |
| 40. Viridiflorol              | 18.021               | 161        | 189         | 204         |             |
| 41. (-)-Guaial                | 18.067               | 161        | 105         | 107         |             |
| 42. (+)-Cedrol                | 18.192               | 150        | 95          | 151         |             |
| 43. $\beta$ -Eudesmol         | 18.810               | 59         | 149         | 164         |             |
| 44. $\alpha$ -Bisabolol       | 19.135               | 204        | 189         | 161         |             |

**Supplementary Table 21.** SIM method parameters for triterpenoids and sterols

| Name                   | Retention Time (min) | Quantifier | Qualifier 1 | Qualifier 2 |
|------------------------|----------------------|------------|-------------|-------------|
| IS: Cholesterol        | 16.093               | 105        | 133         | 386         |
| 1. Campesterol         | 17.044               | 105        | 133         | 400         |
| 2. Stigmasterol        | 17.350               | 105        | 133         | 412         |
| 3. $\beta$ -Sitosterol | 17.955               | 105        | 133         | 414         |
| 4. $\beta$ -Amyrin     | 18.466               | 218        | 189         | 203         |
| 5. Epifriedelanol      | 20.519               | 109        | 123         | 413         |
| 6. Friedelin           | 20.900               | 109        | 123         | 426         |

## References

1. ElSohly, M. A. & Gul, W. Constituents of Cannabis Sativa. in *Handbook of Cannabis* 3–22 (Oxford University Press, 2014). doi:10.1093/acprof:oso/9780199662685.003.0001.
2. Adams, R. P. The serrate leaf margined Juniperus (Section Sabina) of the western hemisphere: systematics and evolution based on leaf essential oils and Random Amplified Polymorphic DNAs (RAPDs). *Biochemical systematics and ecology* **28**, 975–989 (2000).
3. Lucero, M. E., Estell, R. E. & Fredrickson, E. L. The Essential Oil Composition of Psoralea scoparius (A. Gray) Rydb. *Journal of Essential Oil Research* **15**, 108–111 (2003).
4. Linstrom, P. F. & Mallard, W. *NIST Chemistry WebBook-SRD 69*. (2001).
